# Supplementary material for: Is incident rheumatoid arthritis interstitial lung disease associated with methotrexate treatment? Results from a multivariate analysis in the ERAS and ERAN inception cohorts
Source: PubMed Central journal article supplement — BMJ Open. 2019 May 5;9(5):e028466. doi: 10.1136/bmjopen-2018-028466 (PMC6501950; doi:10.1136/bmjopen-2018-028466), 2019-05-05
Supplement: bmjopen-2018-028466supp001.pdf [file bmjopen-2018-028466supp001.pdf]

## **Supplementary Material**

### **Statistical analyses**

#### **Univariate analysis**

The relation between onset of RA-ILD and binary covariates [MTX exposure, gender, baseline: rheumatoid factor (RF, positive/negative), smoking status (ever/never), presence of nodules, extra articular RA major, minor and combined, respiratory major, minor and combined, presence of erosions] was analysed by Chi Squared test, and continuous covariates [age of RA onset, baseline: disease activity score (DAS), ESR, tender joint count (TJC), swollen joint count (SJC), patient global assessment (PGA), Hb, BMI, health assessment questionnaire score (HAQ), number of comorbidities major, minor and combined (including respiratory), number of major comorbidities (excluding respiratory), time from RA symptom onset to first outpatient appointment (months), time from first outpatient appointment to first DMARD (months), time from RA symptom onset to first DMARD (months)] was analysed by t test.

#### **Multivariate analysis model**

Binary logistic models were fitted to the data, using the diagnosis of ILD as the outcome variable to examine possible differences within the variables. The initial covariates included were: MTX exposure (Y/N), gender (M/F), age at onset of RA (years) and presence of rheumatoid factor at baseline (+ve/-ve). Additional covariates were added to the model in turn, to assess whether they improved the model fit. It was not possible to use log likelihood ratio tests (LRTs) to compare models because of varying levels of missing data. Instead, the p-value from each covariate's Wald test was considered, to determine whether there was evidence to include them in the model, as well as assessing whether the odds ratios for other covariates had changed. All covariates significant ( $p < 0.05$ ) and borderline significant ( $p < 0.1$  and  $> 0.05$ ) in the univariate analysis were tested and also some non significant covariates in the univariate analysis were included because they might be of clinical interest (DAS, Hb, TJC,

SJC and PGA, all at baseline). Anti-cyclic citrullinated peptide (anti CCP) antibody data was only collected at a few centres and was insufficient to include in any model.

### **Multivariate time-varying analysis**

Cox proportional hazards models were applied to the data, with the diagnosis of ILD as the binary outcome variable at each year (measured from baseline) that a patient participated in the study. 54 (53.5%) patients of the 101 with ILD had known diagnosis dates or could be approximated to the nearest year. This was up to a maximum of 15 years, to match the time-varying data available for analysis. Of the 54, 48 were diagnosed during the study and so were included within the fitted models. The fixed covariates considered were: gender (M/F), age at onset of RA (years), maximum follow-up (years) and smoking status at baseline (ever/never). Time varying co-variates were DAS, patient global assessment, tender joint count, swollen joint count, ESR, health assessment questionnaire, haemoglobin, BMI, erosions, rheumatoid nodules, major comorbidities. Age at onset of RA, baseline smoking status and maximum follow-up were found to be statistically significant in combination, with all three hazard ratios >1 and all corresponding p-values <0.03. However, maximum follow-up was discounted from the model since adding any time-varying covariates removed its significance. Sex was selected a priori to be in the model to improve precision.

Next, time-varying covariates were considered: MTX exposure (Y/N), DAS (and individually PGA, TJC, SJC and ESR), HAQ, haemoglobin (g/L), presence of rheumatoid factor (RF, +ve/-ve), presence of erosions (Y/N), presence of nodules (Y/N), BMI and number of major comorbidities (excluding respiratory). The model was built by individually adding each covariate, then examining its hazard ratio and corresponding p-value to assess for statistical significance. The components of DAS were assessed both individually and in combination. Covariates were retained if  $p < 0.1$ . Akaike information criterion (AIC) was used to compare the fit of each interim model to those previously fitted, with the final model having the lowest AIC value.

### **Cox regression time to event analysis**

The relation between time of ILD diagnosis after first RA symptoms was explored in the MTX exposed ILD and non-MTX exposed ILD groups using Cox regression time to event analysis, adjusting for the same confounders as in the multivariate model. The time of onset of ILD in relation to first symptoms of RA was taken as the first record of this on the ERAS/ERAN CRF.

Where ILD was recorded on the death certificate but not on the last CRF this time was recorded as last CRF + 1 year if the interval was less than 2 years, and as last CRF + 2 years if this interval was 2 years or longer. In patients with ILD at baseline the time of ILD onset was taken to be synchronous with first RA symptoms.

Supplementary Table 1

ERAS ERAN reasons for discontinuation from follow up

| Reason for discontinuation | All ERAS + ERAN |      | Cohort |      |      |      |
|----------------------------|-----------------|------|--------|------|------|------|
|                            | n               | %    | ERAS   |      | ERAN |      |
|                            | n               | %    | n      | %    | n    | %    |
| Reason for discontinuation | 2701            | 100% | 1465   | 100% | 1236 | 100% |
| Died                       | 491             | 18%  | 360    | 25%  | 131  | 11%  |
| Lost to follow up          | 370             | 14%  | 187    | 13%  | 183  | 15%  |
| Pt Choice                  | 119             | 4%   | 70     | 5%   | 49   | 4%   |
| Moved discharged           | 154             | 6%   | 114    | 8%   | 40   | 3%   |
| Comorbidity                | 28              | 1%   | 21     | 1%   | 7    | 1%   |
| Remission                  | 30              | 1%   | 28     | 2%   | 2    | 0%   |
| Closure                    | 1509            | 56%  | 685    | 47%  | 824  | 67%  |

**Supplementary Table 2a.**

**Primary univariate analysis showing association of incident RA-ILD with MTX exposure and baseline binary covariates, excluding cases with ILD at baseline prior to any csDMARD use.**

|                                    |          | n    | ILD |       | No ILD |       | Odds Ratio | CI            | Chi-squared test p-value |
|------------------------------------|----------|------|-----|-------|--------|-------|------------|---------------|--------------------------|
|                                    |          |      | n   | %     | n      | %     |            |               |                          |
| <b>Total</b>                       |          |      | 67  |       | 2600   |       |            |               |                          |
| <b>MTX</b>                         | Yes      | 2667 | 39  | 58.2% | 1539   | 59.2% | 0.96       | (0.57, 1.63)  | 0.872                    |
|                                    | No       |      | 28  | 41.8% | 1061   | 40.8% |            |               |                          |
| <b>Gender</b>                      | M        | 2667 | 30  | 44.8% | 844    | 32.5% | 1.69       | (1.00, 2.83)  | 0.034                    |
|                                    | F        |      | 37  | 55.2% | 1756   | 67.5% |            |               |                          |
| <b>Rheumatoid Factor</b>           | Positive | 2588 | 52  | 77.6% | 1568   | 60.3% | 2.11       | (1.16, 4.05)  | 0.010                    |
|                                    | Negative |      | 15  | 22.4% | 953    | 36.7% |            |               |                          |
| <b>Anti CCP (ever)</b>             | Positive | 330  | 6   | 9.0%  | 225    | 8.7%  | 1.29       | (0.23, 13.31) | 0.755                    |
|                                    | Negative |      | 2   | 3.0%  | 97     | 3.7%  |            |               |                          |
| <b>Smoker Status</b>               | Ever     | 2106 | 41  | 61.2% | 1081   | 41.6% | 2.29       | (1.25, 4.41)  | 0.004                    |
|                                    | Never    |      | 16  | 23.9% | 968    | 37.2% |            |               |                          |
| <b>Rheumatoid Nodules</b>          | None     | 2667 | 57  | 85.1% | 2436   | 93.7% | 2.61       | (1.16, 5.27)  | 0.005                    |
|                                    | Nodules  |      | 10  | 14.9% | 164    | 6.3%  |            |               |                          |
| <b>Extra-Articular RA features</b> | Yes      | 2667 | 11  | 16.4% | 286    | 11.0% | 1.59       | (0.74, 3.11)  | 0.164                    |
|                                    | No       |      | 56  | 83.6% | 2314   | 89.0% |            |               |                          |
| <b>Respiratory comorbidities</b>   | Yes      | 2667 | 7   | 10.4% | 134    | 5.2%  | 2.15       | (0.81, 4.82)  | 0.056                    |
|                                    | No       |      | 60  | 89.6% | 2466   | 94.8% |            |               |                          |
| <b>Erosions at baseline</b>        | Yes      | 2560 | 18  | 26.9% | 673    | 25.9% | 0.99       | (0.54, 1.75)  | 0.981                    |
|                                    | No       |      | 49  | 73.1% | 1820   | 70.0% |            |               |                          |

**Key**

csDMARD: conventional synthetic disease modifying anti-rheumatic drug, MTX: methotrexate, CCP: anti-cyclic citrullinated peptide antibody

Extra-Articular RA features: Tendon sheath disease, Sjogren's syndrome, ocular rheumatoid disease, Raynaud's

Respiratory comorbidities: History of chronic obstructive pulmonary disease, asthma, pneumonia, tuberculosis, pleural disease

Supplementary Table 2b.

Primary univariate analysis showing association of incident RA-LD with baseline continuous covariates, excluding cases with ILD at baseline prior to any DMARD use.

|                          | n    | ILD |       |                | No ILD |       |                | Difference | t-test<br>p-value |
|--------------------------|------|-----|-------|----------------|--------|-------|----------------|------------|-------------------|
|                          |      | N   | Mean  | CI             | N      | Mean  | CI             |            |                   |
| Age of RA onset (years)  | 2667 | 67  | 61.01 | (58.45, 63.58) | 2600   | 55.87 | (55.32, 56.42) | 5.14       | 0.004             |
| DAS28                    | 2607 | 66  | 4.43  | (4.04, 4.82)   | 2541   | 4.38  | (4.32, 4.45)   | 0.05       | 0.821             |
| ESR                      | 2473 | 63  | 45.51 | (38.76, 52.26) | 2410   | 36.87 | (35.77, 37.96) | 8.64       | 0.014             |
| TJC                      | 2656 | 66  | 10.74 | (7.89, 13.60)  | 2590   | 10.14 | (9.77, 10.52)  | 0.6        | 0.623             |
| SJC                      | 2659 | 67  | 11.46 | (8.70, 14.22)  | 2592   | 12.21 | (11.76, 12.67) | -0.75      | 0.608             |
| PGA                      | 2608 | 66  | 48.35 | (42.08, 54.62) | 2542   | 43.63 | (42.62, 44.64) | 4.72       | 0.146             |
| Hb                       | 2627 | 67  | 12.93 | (12.55, 13.31) | 2560   | 12.85 | (12.79, 12.91) | 0.08       | 0.659             |
| Onset-OPD (months)       | 2642 | 67  | 9.78  | (7.96, 11.59)  | 2575   | 8.22  | (7.98, 8.47)   | 1.56       | 0.053             |
| OPD-csDMARD (months)     | 2357 | 61  | 8.13  | (2.66, 13.60)  | 2296   | 5.57  | (4.95, 6.19)   | 2.56       | 0.197             |
| Onset-csDMARD (months)   | 2361 | 62  | 17.76 | (12.27, 23.25) | 2299   | 14.34 | (13.58, 15.09) | 3.42       | 0.151             |
| Comorbidities (major)    | 2667 | 67  | 0.43  | (0.30, 0.57)   | 2600   | 0.49  | (0.46, 0.52)   | -0.06      | 0.532             |
| Comorbidities (minor)    | 2667 | 67  | 0.46  | (0.31, 0.61)   | 2600   | 0.33  | (0.31, 0.35)   | 0.13       | 0.053             |
| Comorbidities (combined) | 2667 | 67  | 0.9   | (0.69, 1.10)   | 2600   | 0.82  | (0.87, 0.86)   | 0.08       | 0.542             |

|                                                  |      |    |       |                |      |       |                |       |       |
|--------------------------------------------------|------|----|-------|----------------|------|-------|----------------|-------|-------|
| <b>Comorbidities major excluding respiratory</b> | 2667 | 67 | 0.33  | (0.21, 0.45)   | 2600 | 0.47  | (0.44, 0.50)   | -0.14 | 0.127 |
| <b>BMI</b>                                       | 2356 | 56 | 25.98 | (24.70, 27.25) | 2300 | 26.56 | (26.35, 26.76) | -0.58 | 0.390 |
| <b>HAQ</b>                                       | 2625 | 67 | 1.28  | (1.10, 1.45)   | 2558 | 1.11  | (1.08, 1.14)   | 0.17  | 0.090 |

### Key

DAS28: 28 joint disease activity score, ESR: erythrocyte sedimentation rate, TJC: tender joint count, SJC: swollen joint count, PGA: patient global assessment, Hb: haemoglobin, BMI: body mass index, HAQ: health assessment questionnaire, Onset-OPD: time from first RA symptoms to first secondary care outpatient visit, OPD-csDMARD: time from first secondary care outpatient visit to start of conventional synthetic disease modifying anti-rheumatic drug therapy, Onset-csDMARD: time from first RA symptoms to start of conventional synthetic disease modifying anti-rheumatic drug therapy, Co-morbidities major and minor: as per ICD 10 definitions.





Supplementary Table 3a.

Univariate analysis showing association of incident RA-ILD with MTX exposure and baseline binary covariates, extended data set including RA-ILD cases recorded at baseline

|                           |          | n    | ILD |      | No ILD |       | Odds Ratio | CI            | Chi-squared test p-value |
|---------------------------|----------|------|-----|------|--------|-------|------------|---------------|--------------------------|
|                           |          |      | n   | %    | n      | %     |            |               |                          |
| <b>MTX</b>                | Yes      | 2692 | 39  | 2.5% | 1539   | 97.5% | 0.51       | (0.32, 0.79)  | 0.001                    |
|                           | No       |      | 53  | 4.8% | 1061   | 95.2% |            |               |                          |
| <b>Gender</b>             | M        | 2692 | 44  | 5.0% | 844    | 95.0% | 1.91       | (1.23, 2.96)  | 0.002                    |
|                           | F        |      | 48  | 2.7% | 1756   | 97.3% |            |               |                          |
| <b>Rheumatoid Factor</b>  | Positive | 2610 | 65  | 4.0% | 1568   | 96.0% | 1.65       | (1.01, 2.77)  | 0.038                    |
|                           | Negative |      | 24  | 2.5% | 953    | 97.5% |            |               |                          |
| <b>Anti-CCP (ever)</b>    | Positive | 333  | 9   | 3.8% | 225    | 96.2% | 1.94       | (0.39, 18.74) | 0.394                    |
|                           | Negative |      | 2   | 2.0% | 97     | 98.0% |            |               |                          |
| <b>Smoker Status</b>      | Ever     | 2692 | 56  | 4.9% | 1081   | 95.1% | 2.18       | (1.31, 3.74)  | 0.002                    |
|                           | Never    |      | 23  | 2.3% | 968    | 97.7% |            |               |                          |
| <b>Rheumatoid Nodules</b> | None     | 2692 | 79  | 3.1% | 2436   | 96.9% | 2.44       | (1.22, 4.54)  | 0.003                    |
|                           | Nodules  |      | 13  | 7.3% | 164    | 92.7% |            |               |                          |

|                                    |     |      |    |      |      |       |      |              |       |
|------------------------------------|-----|------|----|------|------|-------|------|--------------|-------|
| <b>Extra-Articular RA features</b> | Yes | 2692 | 11 | 3.7% | 286  | 96.3% | 1.10 | (0.52,2.10)  | 0.774 |
|                                    | No  |      | 81 | 3.4% | 2314 | 96.6% |      |              |       |
| <b>Respiratory co-morbidities</b>  | Yes | 2692 | 7  | 5.0% | 134  | 95.0% | 1.52 | (0.58, 3.35) | 0.299 |
|                                    | No  |      | 85 | 3.3% | 2466 | 96.7% |      |              |       |
| <b>Erosions at baseline</b>        | Yes | 2582 | 26 | 3.7% | 673  | 96.3% | 1.12 | (0.67, 1.81) | 0.644 |
|                                    | No  |      | 63 | 3.3% | 1820 | 96.7% |      |              |       |

### Key

MTX: methotrexate, CCP: anti-cyclic citrullinated peptide antibody

Extra-Articular RA features: Tendon sheath disease, Sjogren's syndrome, ocular rheumatoid disease, Raynaud's

Respiratory comorbidities: History of chronic obstructive pulmonary disease, asthma, pneumonia, tuberculosis, pleural disease

Supplementary Table 3b.

Univariate analysis showing association of incident RA-ILD with baseline continuous covariates, extended data set including RA-ILD cases recorded at baseline

|                               | N    | ILD |       |                | No ILD |       |                | Difference | t-test<br>p-value |
|-------------------------------|------|-----|-------|----------------|--------|-------|----------------|------------|-------------------|
|                               |      | n   | Mean  | CI             | N      | Mean  | CI             |            |                   |
| <b>Age RA onset (years)</b>   | 2692 | 92  | 62.8  | (60.68, 64.95) | 2600   | 55.87 | (55.32, 56.42) | 6.93       | <0.0001           |
| <b>DAS28</b>                  | 2495 | 91  | 4.51  | (4.17, 4.85)   | 2541   | 4.38  | (4.32, 4.45)   | 0.13       | 0.445             |
| <b>ESR</b>                    | 2495 | 85  | 47.38 | (41.33, 53.42) | 2410   | 36.87 | (35.77, 37.96) | 10.51      | 0.001             |
| <b>TJC</b>                    | 2681 | 91  | 10.92 | (8.55, 13.30)  | 2590   | 10.14 | (9.77, 10.52)  | 0.78       | 0.455             |
| <b>SJC</b>                    | 2684 | 92  | 12.32 | (9.64, 14.99)  | 2592   | 12.21 | (11.76, 12.67) | 0.11       | 0.935             |
| <b>PGA</b>                    | 2632 | 90  | 46.66 | (41.35, 51.96) | 2542   | 43.63 | (42.62, 44.64) | 3.03       | 0.2786            |
| <b>Hb</b>                     | 2652 | 92  | 12.8  | (12.48, 13.13) | 2560   | 12.85 | (12.79, 12.91) | -0.05      | 0.798             |
| <b>Onset-OPD (months)</b>     | 2666 | 91  | 9.16  | (7.69, 10.64)  | 2575   | 8.22  | (7.98, 8.47)   | 0.94       | 0.174             |
| <b>OPD-csDMARD (months)</b>   | 2379 | 83  | 7.14  | (2.93, 11.36)  | 2296   | 5.57  | (4.95, 6.19)   | 1.57       | 0.356             |
| <b>Onset-csDMARD (months)</b> | 2383 | 84  | 16.49 | (12.13, 20.85) | 2299   | 14.34 | (13.58, 15.09) | 2.15       | 0.294             |
| <b>Comorbidities major</b>    | 2692 | 92  | 0.48  | (0.35, 0.60)   | 2600   | 0.49  | (0.46, 0.52)   | -0.01      | 0.863             |
| <b>Comorbidities minor</b>    | 2692 | 92  | 0.4   | (0.28, 0.52)   | 2600   | 0.33  | (0.31, 0.35)   | 0.07       | 0.212             |
| <b>Comorbidities combined</b> | 2692 | 92  | 0.8   | (0.63, 0.98)   | 2600   | 0.82  | (0.87, 0.86)   | -0.02      | 0.949             |

|                                                  |      |    |      |                |      |       |                |       |        |
|--------------------------------------------------|------|----|------|----------------|------|-------|----------------|-------|--------|
| <b>Comorbidities major excluding respiratory</b> | 2692 | 92 | 0.4  | (0.28, 0.52)   | 2600 | 0.47  | (0.44, 0.50)   | -0.07 | 0.394  |
| <b>BMI baseline</b>                              | 2377 | 77 | 25.9 | (24.82, 26.98) | 2300 | 26.56 | (26.35, 26.76) | -0.66 | 0.256  |
| <b>HAQ at baseline</b>                           | 2650 | 92 | 1.22 | (1.07, 1.37)   | 2558 | 1.11  | (1.08, 1.14)   | 0.11  | 0.2024 |

### Key

DAS28: 28 joint disease activity score, ESR: erythrocyte sedimentation rate, TJC: tender joint count, SJC: swollen joint count, PGA: patient global assessment, Hb: haemoglobin, BMI: body mass index, HAQ: health assessment questionnaire, Onset-OPD: time from first RA symptoms to first secondary care outpatient visit, OPD-csDMARD: time from first secondary care outpatient visit to start of conventional synthetic disease modifying anti-rheumatic drug therapy, Onset-csDMARD: time from first RA symptoms to start of conventional synthetic disease modifying anti-rheumatic drug therapy, Co-morbidities major and minor: as per ICD-10 definitions.

**Supplementary Table 4**

Multivariate analysis stratified by smoking; showing effects of baseline co-variables on incident RA-ILD in smokers, non-smokers and those with missing smoker status at baseline.

|                                          | Overall                |         | Non-smokers          |         | Smokers                 |         | Missing               |         |
|------------------------------------------|------------------------|---------|----------------------|---------|-------------------------|---------|-----------------------|---------|
|                                          | OR (95% CI)            | p-value | OR (95% CI)          | p-value | OR (95% CI)             | p-value | OR (95% CI)           | p-value |
| N                                        | 2015                   |         | 949                  |         | 1066                    |         | 552                   |         |
| Methotrexate exposed                     | 0.85 (0.49, 1.49)      | 0.578   | 0.24 (0.08, 0.70)    | 0.009   | 1.56 (0.74, 3.29)       | 0.240   | 1.35 (0.33, 5.52)     | 0.681   |
| Male gender                              | 1.44 (0.83, 2.48)      | 0.193   | 0.70 (0.20, 2.52)    | 0.587   | 1.8 (0.95, 3.41)        | 0.073   | 1.38 (0.38, 5.02)     | 0.629   |
| Age of RA onset                          | 1.04 (1.02, 1.06)      | <0.001  | 1.03 (0.99, 1.07)    | 0.097   | 1.05 (1.02, 1.08)       | 0.001   | 1.03 (0.99, 1.08)     | 0.172   |
| Baseline RF                              | 2.02 (1.07, 3.82)      | 0.029   | 1.88 (0.64, 5.57)    | 0.254   | 2.20 (1.00, 4.86)       | 0.051   | 2.83 (0.58, 13.85)    | 0.199   |
| Onset-OPD (months)                       | 1.04 (1.00, 1.07)      | 0.027   | 1.005 (0.93, 1.08)   | 0.902   | 1.05 (1.01, 1.09)       | 0.012   | 0.98 (0.87, 1.10)     | 0.699   |
| Baseline Major Comorbidities (Excl Resp) | 0.62 (0.40, 0.95)      | 0.027   | 0.43 (0.15, 1.24)    | 0.119   | 0.64 (0.4, 1.04)        | 0.070   | 0.30 (0.04, 2.39)     | 0.254   |
| Baseline Smoker Status                   | 2.21 (1.21, 4.03)      | 0.010   |                      |         |                         |         |                       |         |
| Constant                                 | 0.0009 (0.0002, 0.005) | <0.001  | 0.005 (0.0004, 0.07) | <0.001  | 0.0006 (0.00008, 0.005) | <0.001  | 0.002 (0.00006, 0.05) | <0.001  |

**Key**

RA: Rheumatoid arthritis, RF: rheumatoid factor

Supplementary Table 5

Multivariate time varying analysis best fit model showing the association of fixed and time-varying co-variates on incident RA-ILD.

|                  |                        | <b>Hazard Ratio<br/>(95% CI)</b> | <b>p</b> |
|------------------|------------------------|----------------------------------|----------|
| Fixed            | Age of RA onset        | 1.07 (1.02, 1.11)                | 0.002    |
|                  | Baseline Smoker Status | 1.52 (0.61, 3.79)                | 0.365    |
|                  | Gender (male)          | 1.19 (0.47, 2.99)                | 0.712    |
| Time-<br>varying | Methotrexate           | 0.96 (0.82, 1.12)                | 0.629    |
|                  | Rheumatoid Factor      | 1.05 (0.96, 1.15)                | 0.279    |
|                  | HAQ                    | 1.15 (1.04, 1.26)                | 0.007    |
|                  | ESR                    | 1 (1, 1.01)                      | 0.01     |
|                  | SJC                    | 0.99 (0.98, 1)                   | 0.058    |

Legend

HAQ Health Assessment Questionnaire; ESR erythrocyte sedimentation rate; SJC swollen joint count
